# Supplementary material for: Distinct IDH1/2-associated Methylation Profile and Enrichment of TP53 and TERT Mutations Distinguish Dedifferentiated Chondrosarcoma from Conventional Chondrosarcoma
Source: PubMed Central journal article supplement (PMC10013202; doi:10.1158/2767-9764.crc-22-0397), 2023-03-14
Supplement: crc-22-0397-s01.pdf [file crc-22-0397-s01.pdf]

**A**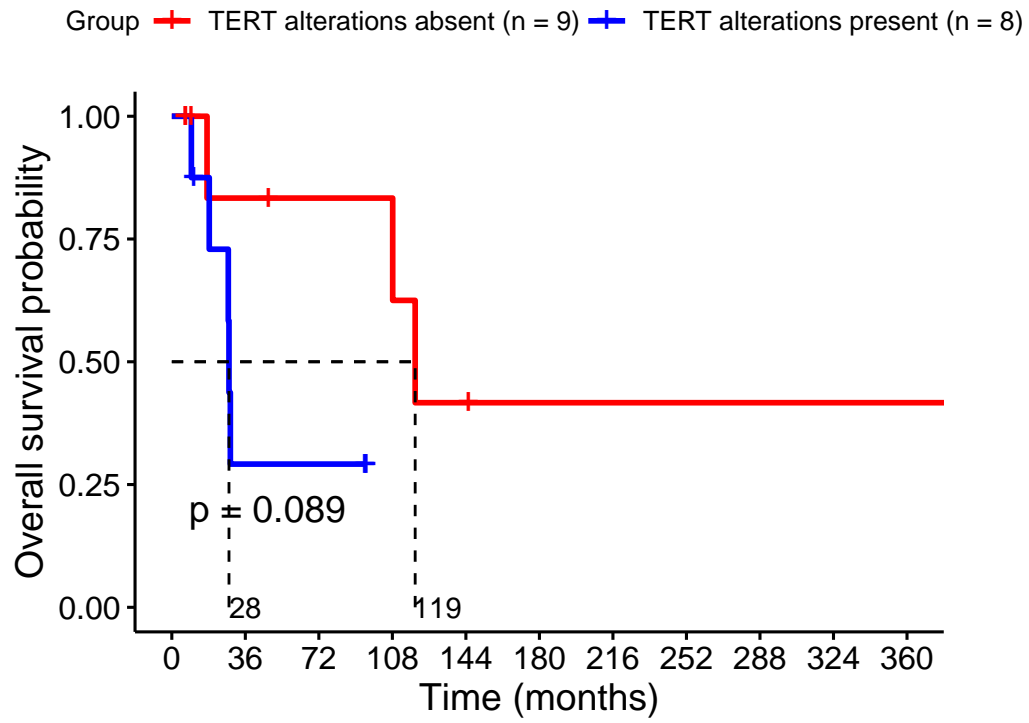**B**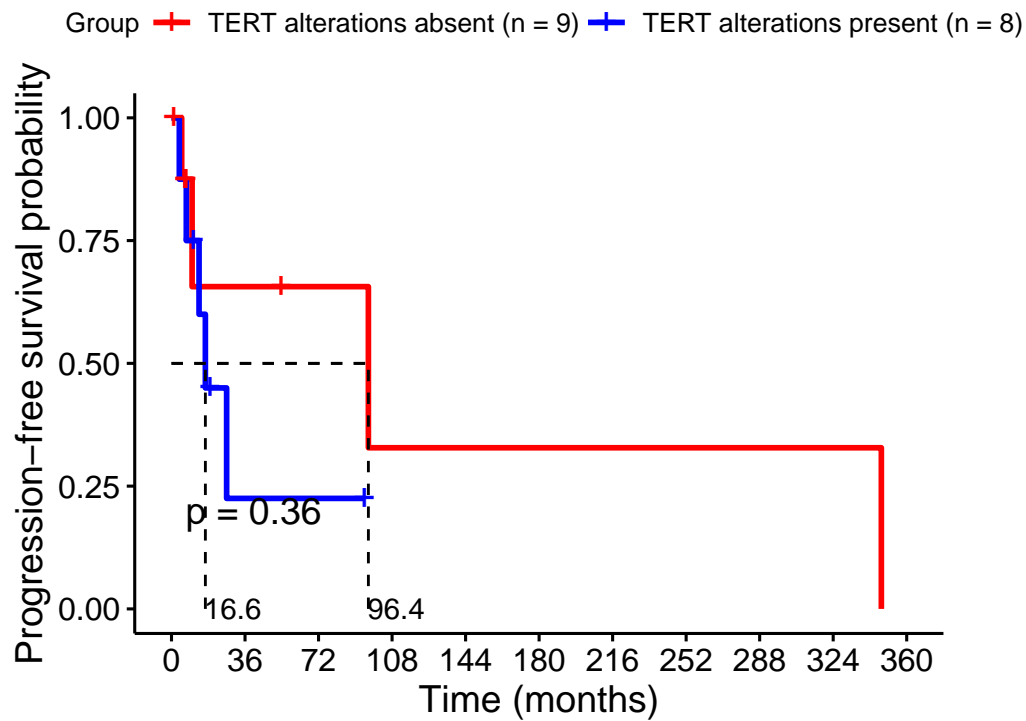**Supplementary Figure S1.**

Kaplan-Meier curves depicting overall (A) and progression-free (B) survival of dedifferentiated chondrosarcoma patients with TERT promoter mutations versus those without TERT promoter mutations (log-rank P test). Dotted lines indicate median survival.
