# Supplementary material for: Distinct IDH1/2-associated Methylation Profile and Enrichment of TP53 and TERT Mutations Distinguish Dedifferentiated Chondrosarcoma from Conventional Chondrosarcoma
Source: Cancer Res Commun. 2023 Mar 14;3(3):431–43. doi: 10.1158/2767-9764.CRC-22-0397 (PMC10013202; doi:10.1158/2767-9764.CRC-22-0397)
Supplement: Supplementary Table TS1 — Gene set enrichment analysis [file crc-22-0397-s02.xlsx]

## Sheet: TableS1.Legend
Supplementary Table S1.
Detailed gene set enrichment analysis results of differentially methylated and differentially expressed genes comparing dedifferentiated chondrosarcoma (DDCS) to conventional chondrosarcoma (CS) within the IDH-mutant group, listing all gene sets and pathways with an adjusted p-value < 0.05.

## Sheet: Hypermethylated_DDCSvCS_IDHmut
Pathway	N	DE	P.DE	FDR	SigGenesInSet
HALLMARK_E2F_TARGETS	193	170	2.38449e-19	1.19225e-17	SMC4	RAD50	CDK4	DDX39A	POP7	CDKN1B	STAG1	CDKN2A	CDKN2C	CDKN3	TACC3	SYNCRIP	IPO7	RNASEH2A	PAICS	SPAG5	CENPE	RAD51AP1	CTCF	POLD3	PLK4	MTHFD2	KIF2C	NUDT21	CHEK1	CIT	CHEK2	EXOSC8	CKS1B	CKS2	CSE1L	KIF18B	SPC24	CTPS1	DCK	DNMT1	DUT	EIF2S1	WDR90	TUBB	EZH2	PDS5B	NUP205	CBX5	ORC6
HALLMARK_MYC_TARGETS_V1	193	164	2.12387e-15	5.30968e-14	G3BP1	TRIM28	CDK2	CDK4	PSMD14	HNRNPR	SF3A1	RACK1	SYNCRIP	CCT7	CCT4	CCT2	PTGES3	TXNL4A	RNPS1	PRDX3	YWHAQ	PWP1	XPOT	PHB2	CBX3	AP3S1	CLNS1A	CTPS1	DHX15	DUT	EEF1B2	EIF2S1	EIF4A1	EIF4E	EIF4G2	EPRS1	ERH	HNRNPA3	NCBP2	CCT5	EXOSC7	FAM120A	SF3B3	XRCC6	PRPF31	SERBP1	RSL1D1	GNL3	PABPC1
HALLMARK_G2M_CHECKPOINT	192	165	1.36461e-14	2.27435e-13	TROAP	CHAF1A	SMC4	G3BP1	CDK4	DDX39A	CDKN1B	STAG1	TRAIP	CDKN2C	CDKN3	NDC80	PRMT5	RBM14	TACC3	SYNCRIP	CENPA	SMC2	CENPE	CTCF	POLQ	PLK4	NUP50	SRSF10	DBF4	CBX1	KIF2C	TENT4A	UBE2C	CHEK1	FOXN3	CKS1B	CKS2	MAPK14	DR1	E2F2	E2F3	E2F4	EFNA5	EWSR1	EZH2	FANCC	ATF5	TPX2	PDS5B
HALLMARK_OXIDATIVE_PHOSPHORYLATION	188	154	1.42249e-13	1.77812e-12	COX17	LRPPRC	TCIRG1	TIMM17A	ACAA2	ATP5PD	ATP5MG	MTX2	MRPS30	PRDX3	AFG3L2	UQCR11	IMMT	PHB2	COX4I1	COX5B	COX6A1	COX6B1	COX7C	COX8A	COX10	COX11	COX15	CPT1A	CS	ECI1	DECR1	CYB5R3	DLAT	DLST	ETFA	ETFB	ALAS1	ETFDH	FDX1	FH	PMPCA	ISCU	NNT	FXN	TIMM10	TIMM9	TIMM8B	UQCRQ	HTRA2
HALLMARK_DNA_REPAIR	144	119	8.16197e-11	8.16197e-10	COX17	ALYREF	EIF1B	CCNO	POLR3C	POLD3	SF3A3	TMED2	CLP1	ADRM1	NUDT21	ADCY6	ERCC8	CANT1	CMPK2	CSTF3	VPS37D	DAD1	DDB1	GSDME	DUT	AGO4	AK1	ERCC2	ERCC3	ERCC4	ERCC5	FEN1	NCBP2	ARL6IP1	POLA2	MPC2	NELFB	POLL	ZNF707	GPX4	GTF2A2	GTF2B	GTF2F1	GTF2H1	GTF2H3	GUK1	SAC3D1	SEC61A1	NT5C
HALLMARK_MTORC1_SIGNALING	194	157	3.52122e-10	2.93435e-09	ABCF2	ACTR3	ACTR2	NAMPT	PSME3	DDX39A	PSMD14	TOMM40	POLR3G	YKT6	MTHFD2	MLLT11	STIP1	IMMT	CORO1A	EGLN3	PDAP1	NIBAN1	ADD3	STARD4	CTH	CYP51A1	DDIT3	DHCR7	DHCR24	DHFR	ENO1	AK4	EPRS1	ACSL3	FDXR	ALDOA	FKBP2	GGA2	NUP205	SEC11A	SDF2L1	PITPNB	SLC37A4	GAPDH	PHGDH	GBE1	NUFIP1	CACYBP	SERP1
HALLMARK_UNFOLDED_PROTEIN_RESPONSE	111	94	8.39035e-09	5.99311e-08	PREB	PDIA6	CEBPB	HYOU1	CEBPG	PAIP1	POP4	MTHFD2	YIF1A	PDIA5	KDELR3	XPOT	CKS1B	DCTN1	DDX10	DCP2	EEF2	EIF2S1	EIF4A1	EIF4A2	EIF4E	EIF4EBP1	EIF4G1	ERN1	SEC31A	ATF6	EXOSC2	SEC11A	MTREX	EDC4	FUS	LSM4	SERP1	LSM1	SPCS1	ERO1A	CXXC1	HSPA5	HSPA9	IARS1	KIF5B	DNAJB9	ASNS	ATF3	ATF4
HALLMARK_MITOTIC_SPINDLE	189	153	1.46941e-08	9.18382e-08	BCL2L11	SMC4	LRPPRC	FARP1	WASF2	NET1	KATNB1	NDC80	TUBGCP3	ARFGEF1	PDLIM5	CENPE	SEPTIN9	TUBGCP2	RALBP1	KIF2C	KPTN	CDC42EP1	CEP250	AKAP13	SYNPO	CNTROB	ARL8A	DYNLL2	CSNK1D	SASS6	DLG1	DYNC1H1	DOCK2	CTTN	EPB41	EPB41L2	KIFAP3	RAB3GAP1	TPX2	CEP131	STK38L	PALLD	KIF1B	FLNB	ATG4B	CLASP1	ARHGEF12	CDC42EP4	CD2AP
HALLMARK_P53_PATHWAY	196	144	5.22557e-05	0.000290309	ABCC5	CDH13	TOB1	CDKN2A	NDRG1	RACK1	BAIAP2	PROCR	SLC19A2	MXD4	HEXIM1	TXNIP	CGRRF1	PLK2	BLCAP	TRAFD1	PLK3	RNF19B	CTSD	DGKA	GADD45A	DDIT3	ABAT	HBEGF	EPHA2	AK1	STOM	ERCC5	F2R	FDXR	HSPA4L	ZNF365	FOXO3	SLC35D1	KIF13B	RRP8	ISCU	FOS	PHLDA3	PLXNB2	ALOX15B	FUCA1	RPL36	RCHY1	PITPNC1
HALLMARK_PROTEIN_SECRETION	88	68	0.000500219	0.00233984	DNM1L	SCAMP3	ADAM10	BET1	ARFGEF2	ARFGEF1	YKT6	TMED2	TMED10	RER1	VPS45	COPE	AP2M1	AP2S1	AP3S1	CLCN3	CLN5	CLTA	CLTC	COPB1	AP1G1	ABCA1	COG2	SEC31A	MON2	KIF1B	STX12	GALC	SGMS1	ARFGAP3	ARFIP1	GNAS	GOLGA4	IGF2R	ARCN1	ARF1	LMAN1	ATP1A1	RAB14	ATP6V1H	ERGIC3	PPT1	MAPK1	RAB22A	RAB2A
[truncated: 128 more columns]

## Sheet: Hypomethylated_DDCSvCS_IDHmut
Pathway	N	DE	P.DE	FDR	SigGenesInSet
HALLMARK_UV_RESPONSE_DN	142	85	0.00144921	0.0724605	AKT3	MRPS31	CITED2	DLC1	PIAS3	CELF2	RBPMS	TENT4A	PTPN21	MGLL	ADD3	COL1A1	COL1A2	COL5A2	NEK7	DAB2	DLG1	DUSP1	ERBB2	F3	EFEMP1	FHL2	WDR37	SYNE1	FYN	NIPBL	GJA1	DMAC2L	GRK5	SCHIP1	ANXA2	APBB2	IGF1R	INSIG1	ITGB3	KCNMA1	KIT	LAMC1	LTBP1	SMAD3	SMAD7	MET	MGMT	MMP16	ABCC1
HALLMARK_PROTEIN_SECRETION	88	48	0.00704524	0.170015	TOM1L1	DNM1L	SCAMP3	ADAM10	ARFGEF2	RER1	AP2M1	AP2S1	CLCN3	CLTC	COPB1	AP2B1	AP1G1	ABCA1	EGFR	COG2	SEC31A	DOP1A	KIF1B	SGMS1	ARFGAP3	GNAS	GOLGA4	IGF2R	ARF1	ATP1A1	PAM	ATP6V1H	ATP6V1B1	RAB2A	SH3GL2	BNIP3	SOD1	DST	TSPAN8	STAM	ANP32E	STX7	AP3B1	VAMP4	STX16	SNAP23	ZW10	COPB2	SCAMP1
HALLMARK_G2M_CHECKPOINT	192	97	0.0102009	0.170015	TROAP	CHAF1A	SMC4	G3BP1	DDX39A	TRAIP	CDKN2C	CDKN3	SYNCRIP	CENPA	CENPF	PLK4	SRSF10	DBF4	CBX1	KIF2C	TENT4A	UBE2C	KATNA1	FOXN3	E2F1	E2F2	E2F4	EFNA5	EGF	EZH2	PDS5B	POLA2	AMD1	UBE2S	RACGAP1	GSPT1	TNPO2	H2AX	HMGA1	HNRNPD	BIRC5	HUS1	INCENP	KPNA2	KMT5A	STMN1	LBR	MARCKS	SMAD3
HALLMARK_IL2_STAT5_SIGNALING	193	97	0.0155309	0.176871	ARL4A	CDKN1C	NDRG1	IFITM3	BATF	FGL2	SMPDL3A	CISH	COL6A1	KLF6	MAP3K8	CTSZ	AHCY	AHR	SPRED2	EMP1	ETV4	ALCAM	F2RL2	FAH	EEF1AKMT1	SWAP70	CYFIP1	GABARAPL1	MAFF	LRIG1	TNFRSF21	FAM126B	GPX4	DCPS	HIPK2	ICOS	SLC29A2	IGF1R	IGF2R	IL2RA	IL4R	IL10	TNFRSF9	ITGA6	IRF4	ITGAE	LTB	MXD1	MAP6
HALLMARK_GLYCOLYSIS	187	94	0.0176871	0.176871	GNPDA1	SLC25A13	CITED2	BPNT1	MERTK	CENPA	RBCK1	KDELR3	EGLN3	B4GALT7	COL5A1	NANP	DCN	AGL	EGFR	ENO1	EXT1	ALDH9A1	ALDOA	COG2	FKBP4	PAXIP1	ZNF292	SLC37A4	PGLS	GALE	GALK1	GALK2	GLCE	B3GAT3	GAPDHS	GFPT1	GCLC	GLRX	GPC1	GUSB	GMPPA	ERO1A	HDLBP	HSPA5	IDUA	IGFBP3	AGRN	KIF2A	STMN1
HALLMARK_REACTIVE_OXYGEN_SPECIES_PATHWAY	47	27	0.0383295	0.319413	STK25	TXNRD2	NQO1	ERCC2	FES	SBNO2	FTL	GCLC	GLRX	GPX3	GPX4	GSR	JUNB	LSP1	MBP	ABCC1	MSRA	NDUFS2	ATOX1	PRDX1	GLRX2	PFKP	PRNP	SOD1	SOD2	TXNRD1	PDLIM1
HALLMARK_P53_PATHWAY	196	95	0.046173	0.329807	CDH13	CDKN2A	CDKN2B	NDRG1	RACK1	BAIAP2	SLC19A2	MXD4	TXNIP	PLK2	BLCAP	TRAFD1	RNF19B	CTSD	DGKA	DDIT3	ABAT	HBEGF	EPHA2	FDXR	ZNF365	FOXO3	SLC35D1	KIF13B	RRP8	PHLDA3	PPP1R15A	PLXNB2	FUCA1	RCHY1	PITPNC1	NUPR1	CYFIP2	MKNK2	OSGIN1	H1-2	TAX1BP3	APAF1	HRAS	IL1A	JAG2	JUN	CD82	KRT17	VWA5A
HALLMARK_HYPOXIA	190	95	0.0552078	0.345049	CDKN1C	CITED2	NDRG1	ILVBL	KDELR3	CAVIN3	COL5A1	KLF6	CP	CSRP2	CCN2	DCN	DDIT3	DTNA	DUSP1	EDN2	EFNA1	EGFR	ENO1	ETS1	EXT1	F3	ALDOA	ZNF292	FOXO3	JMJD6	PPP1R15A	MAFF	SLC37A4	NOCT	GALK1	GAPDH	TIPARP	TES	GAPDHS	AMPD3	GLRX	GPC1	ERO1A	ANXA2	HDLBP	HEXA	HK1	HSPA5	NDST1
HALLMARK_HEME_METABOLISM	182	87	0.0739605	0.410892	TSPAN5	TRIM10	OPTN	RCL1	CDR2	ALDH1L1	FTCD	ERMAP	ADD1	CLCN3	MBOAT2	CPOX	NEK7	CTNS	CTSE	E2F2	EPB41	EPB42	EPOR	MARCHF8	ELL2	DAAM1	FOXO3	TNRC6B	NNT	OSBP2	FBXO7	PGLS	RNF19A	FBXO9	EIF2AK1	GCLC	HTRA2	ANK1	GYPC	HAGH	HDGF	AQP3	BCAM	MARK3	ASNS	SLC11A2	HEBP1	PC	ADIPOR1
HALLMARK_BILE_ACID_METABOLISM	107	48	0.0896137	0.430756	OPTN	ABCA9	CYP46A1	EFHC1	DHCR24	DIO2	ABCA1	ABCA2	EPHX2	ABCA3	ACSL1	ALDH9A1	FDXR	ABCD2	MLYCD	ABCA4	GC	GNMT	IDH2	FADS1	NR3C2	NPC1	SLC22A18	PNPLA8	HSD17B11	PIPOX	ACSL5	PEX1	PEX6	PEX13	PFKM	RETSAT	PEX26	PECR	PXMP2	RBP1	RXRA	ATXN1	SCP2	BMP6	SOD1	TTR	HSD3B7	BCAR3	BBOX1
[truncated: 56 more columns]

## Sheet: Upregulated_DDCSvCS_IDHmut
	ID	Description	setSize	enrichmentScore	NES	pvalue	p.adjust	qvalues	rank	leading_edge	core_enrichment
HALLMARK_E2F_TARGETS	HALLMARK_E2F_TARGETS	HALLMARK_E2F_TARGETS	183	0.741063	3.28321	2.45022e-34	1.22511e-32	7.2217e-33	3488	tags=64%	list=14%	signal=56%	CENPE/MKI67/DLGAP5/CDK1/MELK/TOP2A/TRIP13/RRM2/CDC20/CDKN3/CKS2/DEPDC1/JPT1/PLK4/PLK1/CCNB2/HMMR/H2AX/KIF2C/MAD2L1/CDCA8/LMNB1/UBE2T/NCAPD2/CHEK1/TIMELESS/EZH2/SMC4/BIRC5/CDC25B/MYBL2/LYAR/H2AZ1/SPC25/TMPO/SPAG5/PRIM2/RFC3/KIF18B/HELLS/CTPS1/CSE1L/MCM5/MCM4/DIAPH3/TK1/AURKB/RAD51AP1/GINS1/NOLC1/MCM7/ASF1B/DCLRE1B/SSRP1/KIF4A/RFC2/MCM6/MCM2/IPO7/AURKA/POLA2/LBR/SNRPB/RBBP7/MMS22L/NUP205/CCNE1/PSIP…
HALLMARK_G2M_CHECKPOINT	HALLMARK_G2M_CHECKPOINT	HALLMARK_G2M_CHECKPOINT	186	0.722548	3.20465	5.5838e-31	1.39595e-29	8.22876e-30	3268	tags=55%	list=13%	signal=49%	TPX2/CENPE/MKI67/CENPF/CDK1/TOP2A/UBE2C/KIF20B/KIF11/PBK/CDC20/CDKN3/CKS2/JPT1/TTK/PLK4/BUB1/PLK1/POLQ/CCNB2/HMMR/H2AX/KIF2C/MAD2L1/NDC80/KNL1/CDC6/NEK2/LMNB1/KIF15/EXO1/NUSAP1/GINS2/CHEK1/FBXO5/EZH2/BUB3/SMC4/BIRC5/CDC25B/RBL1/MYBL2/H2AZ1/STIL/TMPO/PRIM2/NSD2/PRC1/RAD54L/MCM5/CHAF1A/INCENP/AURKB/SNRPD1/CENPA/NOLC1/SMC2/KIF4A/CDC45/MCM6/MCM2/AURKA/POLA2/LBR/KIF23/DKC1/AMD1/TROAP/NUP50/HSPA8/CDC25…
HALLMARK_INTERFERON_GAMMA_RESPONSE	HALLMARK_INTERFERON_GAMMA_RESPONSE	HALLMARK_INTERFERON_GAMMA_RESPONSE	193	0.706128	3.13181	6.00595e-30	1.00099e-28	5.90058e-29	2860	tags=64%	list=11%	signal=57%	CXCL10/CXCL9/CXCL11/CD38/APOL6/IFI44L/GBP4/LGALS3BP/TAP1/ST8SIA4/IFI44/GZMA/TNFSF10/RSAD2/HERC6/HLA-DQA1/OAS2/IFIT3/IFIH1/VCAM1/UBE2L6/OAS3/EPSTI1/MX1/NMI/CD69/FGL2/DDX60/SECTM1/PARP14/STAT1/IFIT2/PSME2/VAMP5/SAMHD1/PSME1/PARP12/CCL5/CD274/METTL7B/CD86/XAF1/IFIT1/LCP2/IFI30/IL10RA/MVP/CASP3/VAMP8/CIITA/IL7/IDO1/TXNIP/B2M/CASP1/CASP4/MX2/NLRC5/CASP8/LAP3/STAT4/IRF1/DDX58/TRIM21/IFI35/CD74/FCGR1A/T…
HALLMARK_INTERFERON_ALPHA_RESPONSE	HALLMARK_INTERFERON_ALPHA_RESPONSE	HALLMARK_INTERFERON_ALPHA_RESPONSE	93	0.793061	3.34022	8.83286e-24	1.10411e-22	6.50843e-23	2785	tags=70%	list=11%	signal=63%	CXCL10/CXCL11/GBP2/IFI44L/GBP4/LGALS3BP/TAP1/IFI44/RSAD2/HERC6/IFIT3/IFIH1/UBE2L6/SAMD9/EPSTI1/MX1/OAS1/NMI/DDX60/PARP14/IFIT2/PSME2/PSME1/PARP12/PARP9/IFI30/IL7/TXNIP/B2M/CASP1/SELL/TMEM140/CASP8/LAP3/IRF1/TRIM21/IFI35/CD74/TRIM14/UBA7/PSMB9/CMPK2/HLA-C/USP18/IFI27/IRF2/PSMB8/SP110/OASL/IL4R/DHX58/IL15/IFITM1/GMPR/RIPK2/TDRD7/PNPT1/SAMD9L/ISG15/PSMA3/EIF2AK2/WARS1/RTP4/IFITM3/IRF9
HALLMARK_ALLOGRAFT_REJECTION	HALLMARK_ALLOGRAFT_REJECTION	HALLMARK_ALLOGRAFT_REJECTION	190	0.661217	2.92834	1.8088e-22	1.8088e-21	1.06624e-21	3300	tags=49%	list=13%	signal=43%	CXCL9/CXCL13/CCL13/GBP2/IL2RG/GPR65/PTPRC/ITGAL/TAP1/ST8SIA4/CTSS/SRGN/GZMA/IGSF6/TLR2/HLA-DQA1/STAT1/TRAT1/CD96/CCL5/FYB1/HLA-DRA/CD3E/CD86/LCP2/CD2/EGFR/ITK/CD3D/TAP2/IL7/HCLS1/B2M/TLR1/STAT4/LYN/HLA-DOA/CD80/CD74/IRF8/HLA-E/UBE2D1/ICAM1/WAS/HLA-A/ABCE1/IRF4/IL2RA/IL18/PTPN6/CD3G/IL18RAP/HLA-G/C2/IFNG/KLRD1/STAB1/SPI1/CD8B/HLA-DMB/NCF4/TLR6/IL4R/LY86/IL2RB/IL15/BCAT1/CCR2/RIPK2/CCR1/PRF1/CCL2/H…
HALLMARK_MYC_TARGETS_V1	HALLMARK_MYC_TARGETS_V1	HALLMARK_MYC_TARGETS_V1	185	0.655782	2.90826	2.08943e-21	1.74119e-20	1.02639e-20	5822	tags=65%	list=23%	signal=51%	CDC20/MAD2L1/CCT5/BUB3/H2AZ1/DDX21/PSMC4/CTPS1/MCM5/MCM4/PPM1G/HPRT1/SNRPD1/RUVBL2/NOLC1/MCM7/TCP1/PSMA6/CDC45/PSMA7/MCM6/CCT4/MCM2/CCT3/CCT7/PRPS2/KARS1/RFC4/ABCE1/C1QBP/CSTF2/RRM1/CCT2/SRPK1/USP1/APEX1/PHB2/PSMB3/STARD7/VBP1/VDAC3/CAD/TRIM28/NOP16/PSMA4/KPNB1/IMPDH2/PSMD14/EIF2S1/NCBP2/CLNS1A/SNRPD2/HSPD1/PHB/SNRPD3/NCBP1/XRCC6/PA2G4/G3BP1/EIF4E/RRP9/RAN/HNRNPR/TYMS/SF3B3/PSMB2/RPS5/ILF2/SSB/ER…
HALLMARK_INFLAMMATORY_RESPONSE	HALLMARK_INFLAMMATORY_RESPONSE	HALLMARK_INFLAMMATORY_RESPONSE	192	0.607808	2.69438	2.53546e-16	1.81104e-15	1.06756e-15	2954	tags=43%	list=12%	signal=38%	CXCL10/CXCL9/ROS1/CXCL11/IL7R/MET/CYBB/AQP9/AXL/TNFSF10/TLR2/ABCA1/DCBLD2/NMI/CD82/C3AR1/CD69/PTGER2/CCL5/CSF3R/LCP2/CXCL8/RASGRP1/IL10RA/CD48/MSR1/TLR1/SELL/LYN/IRF1/PLAUR/SERPINE1/PCDH7/ITGA5/ICAM1/RGS1/PTGER4/NOD2/EBI3/CXCL6/PROK2/C5AR1/IL18/IL18RAP/TNFRSF9/KIF1B/STAB1/GPR183/MEFV/ADRM1/FPR1/IL4R/AHR/IL2RB/SLAMF1/IL15/OLR1/IL18R1/IFITM1/CD14/RIPK2/CCL20/KCNJ2/NFKB1/CD70/SLC31A2/CCL2/SELE/ATP2C…
HALLMARK_MYC_TARGETS_V2	HALLMARK_MYC_TARGETS_V2	HALLMARK_MYC_TARGETS_V2	54	0.764132	3.10087	6.3038e-12	3.93987e-11	2.32245e-11	3926	tags=69%	list=15%	signal=58%	PLK4/PLK1/NIP7/MCM5/MCM4/NOLC1/NOP2/FARSA/MRTO4/IPO4/SORD/NDUFAF4/PRMT3/MYBBP1A/EXOSC5/LAS1L/NOP16/WDR74/HSPD1/PHB/PA2G4/RRP9/IMP4/GRWD1/DDX18/UNG/TBRG4/PPRC1/AIMP2/TFB2M/TCOF1/DCTPP1/PES1/WDR43/PUS1/RRP12/CDK4
HALLMARK_MITOTIC_SPINDLE	HALLMARK_MITOTIC_SPINDLE	HALLMARK_MITOTIC_SPINDLE	191	0.552405	2.44795	1.12266e-11	6.23703e-11	3.67656e-11	3113	tags=34%	list=12%	signal=30%	ANLN/TPX2/CENPE/DLGAP5/CENPF/CDK1/TOP2A/KIF20B/KIF11/ECT2/TTK/BUB1/PLK1/CCNB2/KIF2C/NDC80/DOCK2/NEK2/LMNB1/KIF15/NUSAP1/FBXO5/SMC4/BIRC5/PRC1/INCENP/SASS6/MYH9/NIN/KIF4A/DOCK4/EPB41/WASF1/AURKA/EZR/FGD4/MID1/KIF23/CAPZB/RICTOR/TRIO/KIF1B/BRCA2/MID1IP1/MAPRE1/SMC3/VCL/KNTC1/DYNC1H1/SMC1A/ESPL1/KIF22/PXN/CKAP5/ARHGAP4/MARCKS/KIF3C/CDC42/PALLD/CENPJ/SSH2/STAU1/CEP250/ARHGEF3
HALLMARK_COMPLEMENT	HALLMARK_COMPLEMENT	HALLMARK_COMPLEMENT	189	0.553466	2.45271	2.18402e-11	1.09201e-10	6.43711e-11	4205	tags=46%	list=16%	signal=39%	KYNU/GZMK/PLA2G7/CTSC/PLEK/CTSS/GZMA/ERAP2/APOC1/DOCK10/C1QC/CDH13/C1QA/CCL5/CR1/LCP2/RASGRP1/CASP3/FCER1G/ITGAM/APOBEC3G/PLAT/CASP1/TFPI2/CASP4/LAP3/LYN/IRF1/GCA/S100A9/CTSB/PLAUR/PPP4C/DOCK4/PSMB9/PIK3CG/SERPINE1/ADAM9/WAS/FYN/TNFAIP3/S100A12/SERPINB2/IRF2/C2/CASP7/GRB2/CTSL/SH2B3/GMFB/CASP5/MMP12/CDA/OLR1/DOCK9/C1R/CASP10/KIF2A/MMP8/PDP1/TIMP2/LTA4H/CD36/LAMP2/MSRB1/CTSH/SERPING1/STX4/PRDM4/PF…
HALLMARK_IL6_JAK_STAT3_SIGNALING	HALLMARK_IL6_JAK_STAT3_SIGNALING	HALLMARK_IL6_JAK_STAT3_SIGNALING	84	0.624141	2.616	1.06558e-08	4.84355e-08	2.85514e-08	3673	tags=42%	list=14%	signal=36%	CXCL10/CXCL9/CXCL13/CXCL11/CD38/IL2RG/ITGA4/TLR2/STAT1/CSF3R/CSF2RA/IL7/IRF1/CRLF2/PDGFC/EBI3/PTPN1/IL2RA/CBL/MYD88/GRB2/IL4R/CSF2RB/IL18R1/TNFRSF21/CD14/CCR1/FAS/CD36/IRF9/IL12RB1/IL15RA/PTPN2/LTBR/STAT2
HALLMARK_DNA_REPAIR	HALLMARK_DNA_REPAIR	HALLMARK_DNA_REPAIR	138	0.550323	2.40218	3.73059e-08	1.55441e-07	9.16286e-08	5902	tags=50%	list=23%	signal=39%	STX3/RFC3/HCLS1/ALYREF/FEN1/PRIM1/POLA1/HPRT1/SSRP1/ERCC2/RFC2/CMPK2/POLA2/RAD51/RFC4/RALA/ADA/ZWINT/POLR2D/ARL6IP1/TAF13/POLR2E/ADRM1/ELOA/CDA/SF3A3/IMPDH2/NCBP2/UMPS/TYMS/RAE1/BCAP31/PNP/RPA2/GPX4/RFC5/CSTF3/POLD1/NUDT21/POLR2H/TAF10/POLR2J/SUPT4H1/POLR2G/GMPR2/ITPA/LIG1/NELFCD/GTF2H3/SDCBP/TAF6/POLR3C/DUT/NT5C/GTF2F1/TAF12/POLD4/RBX1/ERCC3/RPA3/SURF1/POLE4/CLP1/GTF2H1/GTF2B/MRPL40/GSDME/TARBP2…
HALLMARK_OXIDATIVE_PHOSPHORYLATION	HALLMARK_OXIDATIVE_PHOSPHORYLATION	HALLMARK_OXIDATIVE_PHOSPHORYLATION	195	0.490839	2.1796	1.38055e-07	5.30981e-07	3.12999e-07	6558	tags=54%	list=26%	signal=41%	PDK4/CPT1A/TOMM22/MRPL15/HCCS/SLC25A5/AIFM1/CASP7/ACAA2/NDUFA2/PHB2/SDHB/VDAC3/MRPL11/CS/SLC25A20/CYB5A/MRPS15/TIMM8B/UQCR10/MRPL35/ATP5MC3/PDP1/NDUFA9/NDUFAB1/DLAT/NDUFS2/ALAS1/PRDX3/ATP5PD/IMMT/NDUFB6/NDUFS3/GPX4/MDH2/COX7C/ATP6V0B/IDH3A/TOMM70/DLST/ABCB7/COX8A/VDAC1/ATP5PB/DLD/NDUFB3/HSD17B10/COX10/MFN2/ECHS1/COX7B/FDX1/NDUFV1/ATP5MG/ACAT1/TIMM50/HTRA2/SDHC/IDH3G/TIMM10/FXN/ATP5F1B/NDUFB5/MRPS…
HALLMARK_SPERMATOGENESIS	HALLMARK_SPERMATOGENESIS	HALLMARK_SPERMATOGENESIS	130	0.444506	1.93693	0.000448857	0.00160306	0.000944961	4713	tags=27%	list=18%	signal=22%	CDK1/CDKN3/TTK/BUB1/NCAPH/CCNB2/IL13RA2/KIF2C/NEK2/EZH2/DCC/CLGN/AURKA/RFC4/IL12RB2/VDAC3/TOPBP1/PRKAR2A/DBF4/NF2/RPL39L/CFTR/SYCP1/AGFG1/ADAM2/MTOR/PSMG1/TUBA3C/ZPBP/ARL4A/NPY5R/PGS1/CLPB/GAD1/HSPA4L
HALLMARK_KRAS_SIGNALING_UP	HALLMARK_KRAS_SIGNALING_UP	HALLMARK_KRAS_SIGNALING_UP	187	0.391233	1.73579	0.00138982	0.00463273	0.00273087	1403	tags=21%	list=5%	signal=20%	CXCL10/TMEM158/PDCD1LG2/IL7R/PLAU/IL2RG/LY96/CTSS/BIRC3/ADAMDEC1/DCBLD2/EPHB2/DOCK2/C3AR1/LCP1/TNNT2/MMD/TLR8/CSF2RA/H2BC3/IL10RA/FCER1G/PLAT/SPON1/ETV1/NIN/IKZF1/CD37/IRF8/PLAUR/GABRA3/LAPTM5/TFPI/TNFAIP3/CXCR4/AMMECR1/CBL/PSMB8/TMEM176B
HALLMARK_FATTY_ACID_METABOLISM	HALLMARK_FATTY_ACID_METABOLISM	HALLMARK_FATTY_ACID_METABOLISM	150	0.405905	1.77871	0.00151868	0.00474586	0.00279756	5900	tags=40%	list=23%	signal=31%	GLUL/UBE2L6/PTPRG/PSME1/ALDH1A1/ACSL4/ACSL5/SMS/H2AZ1/PCBD1/CPT1A/HSD17B11/HSPH1/ACSL1/FABP2/METAP1/LGALS1/HCCS/ADSL/ACAA2/APEX1/HSP90AA1/RAP1GDS1/ALDH9A1/VNN1/HSD17B4/ADIPOR2/CD36/SUCLG2/ODC1/MDH2/NSDHL/HPGD/DLST/DLD/HSD17B10/ECHS1/SDHC/IDH3G/HSD17B7/UROD/CBR1/HSDL2/BLVRA/ACOT2/PDHB/FH/CPOX/ADH7/ECH1/RDH11/YWHAH/G0S2/CPT2/FASN/ACSS1/EHHADH/PRDX6/HADHB/UROS
HALLMARK_MTORC1_SIGNALING	HALLMARK_MTORC1_SIGNALING	HALLMARK_MTORC1_SIGNALING	187	0.382275	1.69604	0.0022014	0.00642332	0.00378638	3089	tags=30%	list=12%	signal=27%	RRM2/CTSC/BUB1/PLK1/FGL2/CORO1A/IFI30/STIP1/PSMC4/M6PR/POLR3G/DAPP1/MCM4/HPRT1/MCM2/SLC2A3/SLA/AURKA/GSR/CXCR4/NUP205/CACYBP/CDC25A/SORD/PRDX1/MTHFD2L/UCHL5/ACTR3/CCNF/BCAT1/PSME3/ACTR2/PSMA4/HMBS/PSMD14/HSPD1/G6PD/HSPA4/TXNRD1/CCT6A/ITGB2/RRP9/SLC6A6/PDAP1/PSMA3/ADIPOR2/WARS1/LTA4H/TUBG1/SYTL2/PNP/EDEM1/GLRX/IMMT/UNG/PSMD12/PPA1
HALLMARK_APOPTOSIS	HALLMARK_APOPTOSIS	HALLMARK_APOPTOSIS	147	0.397975	1.74405	0.0023124	0.00642332	0.00378638	3038	tags=29%	list=12%	signal=26%	PMAIP1/TOP2A/CD38/DPYD/TAP1/BIRC3/HGF/TNFSF10/CD69/CD2/CDC25B/CASP3/TXNIP/PLAT/CASP1/CASP4/CASP8/IRF1/PAK1/CAV1/SOD2/GSR/PLCB2/IL18/PEA15/H1-0/CASP7/CFLAR/CD14/PRF1/BCL2L1/GPX1/DNM1L/BCAP31/DAP3/HSPB1/TIMP2/BID/FAS/IFITM3/CYLD/SAT1/GPX4
HALLMARK_IL2_STAT5_SIGNALING	HALLMARK_IL2_STAT5_SIGNALING	HALLMARK_IL2_STAT5_SIGNALING	195	0.352165	1.56381	0.00934116	0.024582	0.0144904	3042	tags=31%	list=12%	signal=27%	CXCL10/GPR65/GBP4/TNFSF10/CDC6/FGL2/GALM/PTGER2/GLIPR2/ICOS/ADAM19/CD86/SYT11/IL10RA/CD48/CASP3/SELL/SMPDL3A/F2RL2/IRF8/NOP2/EOMES/SLC2A3/CTSZ/IRF4/IL2RA/NT5E/TLR7/TNFRSF9/CCNE1/LRIG1/SH3BGRL2/GSTO1/CDCP1/SYNGR2/FLT3LG/BATF3/HIPK2/CST7/IL4R/AHR/IL2RB/IL18R1/TNFRSF21/SCN9A/IL1RL1/PLIN2/NCS1/BCL2L1/PTRH2/CCND3/UMPS/NCOA3/MAPKAPK2/PNP/IFITM3/CTLA4/ECM1/GPX4/ODC1
HALLMARK_PI3K_AKT_MTOR_SIGNALING	HALLMARK_PI3K_AKT_MTOR_SIGNALING	HALLMARK_PI3K_AKT_MTOR_SIGNALING	101	0.390302	1.6566	0.0160711	0.0401778	0.0236837	4962	tags=38%	list=19%	signal=30%	CDK1/IL2RG/EGFR/DAPP1/SLA/CXCR4/AP2M1/PPP1CA/MYD88/GRB2/ACTR3/E2F1/ACTR2/PRKAR2A/PITX2/IRAK4/YWHAB/EIF4E/GRK2/PFN1/MAPKAP1/RALB/MAPK1/NFKBIB/STAT2/MKNK1/ARHGDIA/CDK4/ARPC3/CLTC/PRKCB/GNGT1/RPS6KA1/VAV3/PPP2R1B/LCK/CDK2/DUSP3

## Sheet: Downregulated_DDCSvCS_IDHmut
	ID	Description	setSize	enrichmentScore	NES	pvalue	p.adjust	qvalues	rank	leading_edge	core_enrichment
HALLMARK_HYPOXIA	HALLMARK_HYPOXIA	HALLMARK_HYPOXIA	190	0.536731	2.76839	1.05791e-09	4.91599e-08	3.20833e-08	2446	tags=34%	list=10%	signal=31%	PPP1R3C/CCN2/CCN1/STC2/DCN/ALDOC/CHST3/P4HA1/FOS/BGN/SCARB1/BHLHE40/RORA/LOX/VEGFA/CP/DPYSL4/FAM162A/VLDLR/GPC4/PDK3/TMEM45A/TIPARP/GPC1/PGAM2/PDK1/NFIL3/DDIT3/GPC3/ANKZF1/UGP2/IRS2/PPARGC1A/PYGM/SLC2A1/SDC2/ATF3/PAM/SDC3/BCL2/RRAGD/ACKR3/SDC4/PFKFB3/LDHA/PNRC1/AK4/NDRG1/NR3C1/ZFP36/WSB1/DUSP1/PHKG1/IGFBP3/SELENBP1/GAA/MXI1/KDELR3/CDKN1A/ZNF292/HEXA/HDLBP/PGM1/PFKP
HALLMARK_EPITHELIAL_MESENCHYMAL_TRANSITION	HALLMARK_EPITHELIAL_MESENCHYMAL_TRANSITION	HALLMARK_EPITHELIAL_MESENCHYMAL_TRANSITION	193	0.526993	2.72298	1.9664e-09	4.91599e-08	3.20833e-08	1613	tags=28%	list=6%	signal=27%	MATN3/FMOD/COMP/COL11A1/MMP3/FGF2/CCN2/CRLF1/MGP/CCN1/SFRP1/DCN/EDIL3/LRRC15/SERPINE2/LOXL2/COL12A1/GADD45B/PCOLCE2/LUM/ECM2/PLOD2/BGN/LRP1/SPP1/COL16A1/LOX/VEGFA/ABI3BP/THBS1/PMP22/IGFBP2/GPC1/MATN2/TIMP3/COL8A2/SLIT3/INHBA/FOXC2/NID2/ELN/EFEMP2/APLP1/SDC4/PMEPA1/ITGB3/CDH11/SPARC/FBLN5/TNFRSF11B/ID2/SGCG/FBLN2/GREM1/TPM1
HALLMARK_MYOGENESIS	HALLMARK_MYOGENESIS	HALLMARK_MYOGENESIS	182	0.508025	2.62437	4.51322e-08	5.83719e-07	3.80953e-07	3219	tags=41%	list=13%	signal=36%	FGF2/APOD/PPP1R3C/STC2/PDE4DIP/SORBS1/MYL3/GADD45B/TPD52L1/FXYD1/ACTA1/SCD/MYH11/IGF1/EFS/BHLHE40/TNNT3/MYOZ1/MAPRE3/PTGIS/MEF2A/FST/PGAM2/SOD3/COL15A1/CKM/ACTN2/PLXNB2/COX7A1/GSN/PYGM/CSRP3/EPHB3/TNNI2/ITGB4/DAPK2/MYH7/LSP1/WWTR1/MYF6/SPARC/GPX3/MYH2/SGCG/MEF2D/MYOM1/MYH1/PC/CASQ1/ATP2A1/IGFBP3/MYL2/CRYAB/COX6A2/CKMT2/GAA/PTP4A3/CDKN1A/SLC6A8/HDAC5/MEF2C/MYOM2/KLF5/IGFBP7/GABARAPL2/AK1/ANKRD2/AC…
HALLMARK_ESTROGEN_RESPONSE_EARLY	HALLMARK_ESTROGEN_RESPONSE_EARLY	HALLMARK_ESTROGEN_RESPONSE_EARLY	192	0.508386	2.62494	4.66975e-08	5.83719e-07	3.80953e-07	2859	tags=30%	list=11%	signal=27%	SLC27A2/MUC1/PAPSS2/FOXC1/DHRS3/STC2/KCNK5/DLC1/SEMA3B/FOS/GFRA1/TUBB2B/TPD52L1/SLC7A5/PTGES/RHOD/SCARB1/BHLHE40/EGR3/TIPARP/FLNB/HR/SLC7A2/SLC24A3/HES1/SCNN1A/DHCR7/SLC2A1/CHPT1/BCL2/FARP1/IGF1R/SLC26A2/TOB1/SEC14L2/SYBU/DEPTOR/MED13L/CYP26B1/SLC16A1/SLC22A5/ABAT/TSKU/RHOBTB3/KLF4/OLFM1/MAPT/KLF10/KLK10/MPPED2/IL6ST/SFN/INHBB/MYC/SYNGR1/GREB1/SYT12/TFAP2C
HALLMARK_UV_RESPONSE_DN	HALLMARK_UV_RESPONSE_DN	HALLMARK_UV_RESPONSE_DN	134	0.476833	2.41862	3.67627e-05	0.000367627	0.000239925	1712	tags=27%	list=7%	signal=25%	COL11A1/CCN1/MMP16/ID1/DLC1/KCNMA1/CDC42BPA/EFEMP1/DBP/ZMIZ1/BHLHE40/PLCB4/PMP22/VLDLR/IGFBP5/BCKDHB/SIPA1L1/MAGI2/PTPRM/SMAD7/CDON/DDAH1/SDC2/IGF1R/APBB2/ARHGEF9/ITGB3/INSIG1/FBLN5/LPAR1/NR3C1/RXRA/ATRN/RBPMS/DUSP1/PRKAR2B
HALLMARK_KRAS_SIGNALING_DN	HALLMARK_KRAS_SIGNALING_DN	HALLMARK_KRAS_SIGNALING_DN	191	0.412042	2.12657	0.00013717	0.00114309	0.000746015	2047	tags=16%	list=8%	signal=15%	COL2A1/FGFR3/SLC38A3/NR4A2/THRB/GPRC5C/SYNPO/THNSL2/IGFBP2/COPZ2/MYOT/CNTFR/C5/ZBTB16/BTG2/CKM/SKIL/RGS11/ADRA2C/IDUA/MYH7/CYP39A1/EFHD1/TCF7L1/PRKN/HSD11B2/TAS2R4/MACROH2A2/EDN1/NRIP2
HALLMARK_ESTROGEN_RESPONSE_LATE	HALLMARK_ESTROGEN_RESPONSE_LATE	HALLMARK_ESTROGEN_RESPONSE_LATE	181	0.410674	2.11837	0.000284809	0.00203435	0.00132768	2558	tags=24%	list=10%	signal=22%	FGFR3/SLC27A2/CXCL14/PAPSS2/FOXC1/KCNK5/SLC29A1/PLXNB1/SEMA3B/FOS/TPD52L1/SLC7A5/PTGES/CA2/SCARB1/EGR3/SCUBE2/FLNB/HR/SLC24A3/SCNN1A/DHCR7/CHPT1/BCL2/FARP1/SLC26A2/TOB1/EMP2/ID2/ZFP36/CYP26B1/SLC16A1/PRKAR2B/CHST8/SLC22A5/KLF4/LSR/OLFM1/MAPT/PERP/KLK10/IL6ST/SFN/GPER1
HALLMARK_GLYCOLYSIS	HALLMARK_GLYCOLYSIS	HALLMARK_GLYCOLYSIS	188	0.398302	2.05909	0.000357719	0.00223574	0.00145912	2446	tags=27%	list=10%	signal=25%	SOX9/STC2/DCN/P4HA1/PLOD2/CHST6/VEGFA/DPYSL4/FAM162A/VLDLR/CHPF/GPC4/TGFA/PDK3/GPC1/TPST1/PGAM2/CHST1/GPC3/ANKZF1/UGP2/IRS2/SDC2/SLC16A3/PAM/SDC3/IDUA/PYGB/RRAGD/GLCE/LDHA/AK4/PFKFB1/PYGL/CHST12/PC/B4GALT7/NOL3/IGFBP3/B4GALT4/GFPT1/PLOD1/MXI1/KDELR3/ZNF292/HOMER1/ME1/CTH/HDLBP/GAL3ST1/PFKP
HALLMARK_HEDGEHOG_SIGNALING	HALLMARK_HEDGEHOG_SIGNALING	HALLMARK_HEDGEHOG_SIGNALING	35	0.63384	2.84228	0.000462527	0.0025696	0.001677	3697	tags=46%	list=14%	signal=39%	UNC5C/PTCH1/GLI1/HEY2/VEGFA/AMOT/VLDLR/CNTFR/OPHN1/NKX6-1/NF1/TLE1/DPYSL2/NRCAM/CRMP1/LDB1
HALLMARK_CHOLESTEROL_HOMEOSTASIS	HALLMARK_CHOLESTEROL_HOMEOSTASIS	HALLMARK_CHOLESTEROL_HOMEOSTASIS	67	0.484246	2.32656	0.00312634	0.0156317	0.0102018	3773	tags=34%	list=15%	signal=29%	ALDOC/SEMA3B/SCD/PDK3/JAG1/NIBAN1/NFIL3/DHCR7/TRIB3/ATF3/ABCA2/IDI1/HMGCR/PNRC1/LDLR/LGALS3/GPX8/ATXN2/SQLE/HMGCS1/CD9/LPL/FDFT1
HALLMARK_TGF_BETA_SIGNALING	HALLMARK_TGF_BETA_SIGNALING	HALLMARK_TGF_BETA_SIGNALING	53	0.495982	2.33207	0.00680409	0.0309277	0.0201844	4479	tags=43%	list=17%	signal=36%	SMAD6/ID1/THBS1/JUNB/BMP2/SMAD7/SKIL/LTBP2/NOG/WWTR1/PMEPA1/ID2/SLC20A1/FURIN/SKI/KLF10/SMAD3/BMPR2/BMPR1A/TGFB1/PPP1R15A/TGFBR1/BCAR3
HALLMARK_PANCREAS_BETA_CELLS	HALLMARK_PANCREAS_BETA_CELLS	HALLMARK_PANCREAS_BETA_CELLS	39	0.507406	2.30421	0.00859389	0.0358079	0.0233693	4847	tags=33%	list=19%	signal=27%	PCSK2/VDR/FOXA2/STXBP1/FOXO1/NKX6-1/ABCC8/PDX1/AKT3/PAX4/CHGA/PKLR/SRPRB
HALLMARK_BILE_ACID_METABOLISM	HALLMARK_BILE_ACID_METABOLISM	HALLMARK_BILE_ACID_METABOLISM	109	0.383824	1.91324	0.0111346	0.0419016	0.0273463	1741	tags=17%	list=7%	signal=16%	SLC27A2/SLC29A1/ABCA5/BMP6/SLC35B2/CYP7B1/ABCA8/NR3C2/LONP2/DIO2/CYP27A1/ABCA2/IDI1/CYP39A1/SLC23A2/RXRA/ABCA9/EPHX2/PEX12
HALLMARK_TNFA_SIGNALING_VIA_NFKB	HALLMARK_TNFA_SIGNALING_VIA_NFKB	HALLMARK_TNFA_SIGNALING_VIA_NFKB	192	0.324979	1.67796	0.0117325	0.0419016	0.0273463	3081	tags=29%	list=12%	signal=25%	DRAM1/SAT1/SERPINB8/NFKBIA/PTX3/PTPRE/TNFAIP8/SPHK1/FJX1/MARCKS/CCL2/NFKB1/CCL20/RIPK2/YRDC/OLR1/CFLAR/LAMB3/TNFAIP2/GPR183/TNFRSF9/MSC/SERPINB2/IL18/SOD2/TNFAIP3/CXCL6/PTGER4/BCL2A1/ICAM1/SLC2A3/SERPINE1/B4GALT5/PLAUR/FOSL1/PLK2/CD80/DDX58/IRF1/AREG/CCL5/IFIT2/CD69/PANX1/IFIH1/ABCA1/TLR2/BIRC3/PLEK/TAP1/PLAU/KYNU/IL7R/CXCL11/CXCL10
HALLMARK_P53_PATHWAY	HALLMARK_P53_PATHWAY	HALLMARK_P53_PATHWAY	190	0.335634	1.73116	0.014871	0.0495701	0.032351	3419	tags=29%	list=13%	signal=26%	VDR/FOS/MDM2/TPD52L1/EPS8L2/FAM162A/TGFA/CCND2/SLC35D1/TSPYL2/ZBTB16/BTG2/DDIT3/CDKN2B/BMP2/PLXNB2/TRAF4/CDKN2A/TRIB3/ATF3/ITGB4/TOB1/SLC7A11/PHLDA3/NDRG1/RXRA/ZMAT3/DDB2/ABAT/NUPR1/POLH/TSC22D1/KLF4/PVT1/ABHD4/CDKN1A/PIDD1/PERP/AEN/EPHA2/SFN/INHBB/CTSF/CCNG1/JAG2/AK1/FBXW7/KIF13B/IER3/POM121/PITPNC1/SERPINB5/TNFSF9/NINJ1/SESN1/SERTAD3
